# Supplementary material for: Evaluating patient factors, operative management and postoperative outcomes in trauma laparotomy patients worldwide: a protocol for a global observational multicentre trauma study
Source: HighWire-hosted journal article supplement (doi:10.1136/bmjopen-2023-083135), 2024-04-01
Supplement: bmjopen-2023-083135supp001_data_supplement.pdf [file bmjopen-2023-083135supp001_data_supplement.pdf]

## Supplementary Material

### Authorship Model

Fully named authors on the by-line of any publications resulting from this study will be those that satisfy the International Committee of Medical Journal Editors ([www.icmje.org](http://www.icmje.org)) guidelines for authorship, namely those in the Steering Committee and Advisory Committee.

All collaborators (Local Leads, Local Collaborators, and Data Validators) will then be listed individually as PubMed-citable collaborator status authors under the collaborator authorship name, as outlined in the Guidelines for Standardising Reporting of Authorship in Collaborative Research (23). The roles are defined below:

- Steering Committee - A core group who have the responsibility for protocol design, project co-ordination, and data handling
- Advisory Committee – An external group of doctors with expertise within trauma and pre-hospital care to provide advice and guidance to the development and completion of the study
- Local Lead – A doctor who ensures the successful delivery of the study at their respective centre; their responsibilities include:
  - Obtaining appropriate governance registration at their centre
  - Identifying, managing, and co-ordinating their centre’s collaborators and data validator throughout the study
  - Providing point of contact for patient enquiries if required locally
  - Ensuring all data is uploaded to the secure web-based data capture system by the relevant deadline
- Local Collaborators – A group of up to 3 doctors, healthcare professionals, or medical students responsible for the data collection for each data collection period at their respective centre
- Data Validator – A doctor, healthcare professional, or medical student, independent to the data collection team, at select centres used to check case ascertainment and data accuracy in a select study period

Tables

Supplementary Table 1 – Data Collection Points for the GOAL-Trauma Study

| Admission                                                                                                    |                                                                                                                  |
|--------------------------------------------------------------------------------------------------------------|------------------------------------------------------------------------------------------------------------------|
| Age                                                                                                          |                                                                                                                  |
| Sex                                                                                                          | Male/Female/Unknown                                                                                              |
| Mechanism of Injury                                                                                          | Blunt/Penetrating                                                                                                |
| Date/Time of Injury                                                                                          | HH:MM DD/MM/YYYY                                                                                                 |
| Date/Time of Presentation to Hospital                                                                        | HH:MM DD/MM/YYYY                                                                                                 |
| Date/Time of Decision to Operate                                                                             | HH:MM DD/MM/YYYY                                                                                                 |
| Was the patient directly transferred from the scene of injury to the hospital where surgery is taking place? | Yes / No                                                                                                         |
| Method of transport to the hospital where surgery is taking place? (optional)                                | Land Ambulance / Bystander Support / Private Vehicle / Police / By Foot / Air Ambulance / Other (please specify) |
| Physiology on Arrival                                                                                        |                                                                                                                  |
| - Oxygen Saturation (sO2)                                                                                    | %                                                                                                                |
| - Inspired Oxygen                                                                                            | %                                                                                                                |
| - Respiratory rate                                                                                           | Breaths per minute                                                                                               |
| - Heart rate                                                                                                 | Beats per minute                                                                                                 |
| - Blood pressure (systolic / diastolic)                                                                      | mmHg                                                                                                             |
| - Glasgow Coma Score                                                                                         | /15                                                                                                              |
| Admission blood tests (optional)                                                                             |                                                                                                                  |
| Base excess                                                                                                  | mmol/L                                                                                                           |
| Lactate                                                                                                      | mmol/L                                                                                                           |
| Haemoglobin                                                                                                  | g/L                                                                                                              |

|                                              |                                                                                                                                                                                                                                |
|----------------------------------------------|--------------------------------------------------------------------------------------------------------------------------------------------------------------------------------------------------------------------------------|
| Creatinine                                   | mmol/L                                                                                                                                                                                                                         |
| INR                                          |                                                                                                                                                                                                                                |
| Blood products given pre-operatively         | Yes / No                                                                                                                                                                                                                       |
| Total pre-operative resuscitation (optional) |                                                                                                                                                                                                                                |
| - Crystalloids                               | mL                                                                                                                                                                                                                             |
| - Colloids                                   | mL                                                                                                                                                                                                                             |
| - Packed red blood cells                     | units                                                                                                                                                                                                                          |
| - Fresh frozen plasma                        | units                                                                                                                                                                                                                          |
| - Platelets                                  | pools                                                                                                                                                                                                                          |
| - Cryoprecipitate                            | units                                                                                                                                                                                                                          |
| - Whole blood                                | units                                                                                                                                                                                                                          |
| - Tranexamic acid                            | g                                                                                                                                                                                                                              |
| Pre-operative antibiotics                    | Yes / No<br>If Yes, before arrival to presenting hospital / before arrival to theatre / in theatre                                                                                                                             |
| Pre-operative investigations                 | Blood tests<br>Ultrasound scan (including FAST scan)<br>Plain Film Radiographs (X-ray)<br>Computerized Tomography (CT) scan<br>Magnetic resonance imaging (MRI) scan<br>Diagnostic Peritoneal Lavage (DPL) or Aspiration (DPA) |
| Operative                                    |                                                                                                                                                                                                                                |
| Indication for surgery                       | Control bleeding<br>Control contamination<br>Exploration<br>Other                                                                                                                                                              |
| ASA score                                    | I II III IV V                                                                                                                                                                                                                  |

|                                                                     |                                                                                                                                                                                                                                                                                                                                                                                                                                                                                                                                                             |
|---------------------------------------------------------------------|-------------------------------------------------------------------------------------------------------------------------------------------------------------------------------------------------------------------------------------------------------------------------------------------------------------------------------------------------------------------------------------------------------------------------------------------------------------------------------------------------------------------------------------------------------------|
| Date/Time Operation Started                                         | HH:MM DD/MM/YYYY                                                                                                                                                                                                                                                                                                                                                                                                                                                                                                                                            |
| Physiology at Induction                                             |                                                                                                                                                                                                                                                                                                                                                                                                                                                                                                                                                             |
| - Oxygen Saturation (sO2)                                           | %                                                                                                                                                                                                                                                                                                                                                                                                                                                                                                                                                           |
| - Inspired Oxygen                                                   | %                                                                                                                                                                                                                                                                                                                                                                                                                                                                                                                                                           |
| - Respiratory rate                                                  | Breaths per minute                                                                                                                                                                                                                                                                                                                                                                                                                                                                                                                                          |
| - Heart rate                                                        | Beats per minute                                                                                                                                                                                                                                                                                                                                                                                                                                                                                                                                            |
| - Blood pressure (systolic / diastolic)                             | mmHg                                                                                                                                                                                                                                                                                                                                                                                                                                                                                                                                                        |
| - Glasgow Coma Score                                                | /15                                                                                                                                                                                                                                                                                                                                                                                                                                                                                                                                                         |
| Intubated                                                           | Yes / No<br>If Yes, before arrival to presenting hospital / before arrival to theatre / in theatre                                                                                                                                                                                                                                                                                                                                                                                                                                                          |
| Regional Anaesthesia                                                | Yes / No<br>If yes, spinal anaesthesia / epidural anaesthesia / transversus abdominis plane (TAP) block                                                                                                                                                                                                                                                                                                                                                                                                                                                     |
| Was the patient requiring circulatory support at time of induction? | Yes / No                                                                                                                                                                                                                                                                                                                                                                                                                                                                                                                                                    |
| Abdominal Injuries Sustained                                        | As per AIS dictionary                                                                                                                                                                                                                                                                                                                                                                                                                                                                                                                                       |
| Non-abdominal Injuries Sustained                                    | As per AIS dictionary                                                                                                                                                                                                                                                                                                                                                                                                                                                                                                                                       |
| Procedures Performed during Laparotomy (tick all that apply)        | Upper gastrointestinal procedure: Resection (stapled or tied off stomach or bowel) / Resection (with anastomosis) / Bypass procedure (no resection) / Primary repair<br><br>Small bowel procedure: Resection (stapled or tied off bowel) / Resection (with anastomosis) / Primary repair / Stoma formation<br><br>Lower gastrointestinal procedure: Resection (stapled or tied off bowel) / Resection (with anastomosis) / Primary repair / Stoma formation<br><br>Vascular procedure: Ligation / Bypass / Primary Repair / Shunt / Graft / Other (specify) |

|                                                                                                             |                                                                                                                                                                                                                                       |
|-------------------------------------------------------------------------------------------------------------|---------------------------------------------------------------------------------------------------------------------------------------------------------------------------------------------------------------------------------------|
|                                                                                                             | Other procedure: Nephrectomy / Splenectomy / Pancreatectomy (partial or complete) / Cholecystectomy / Liver packing / Pelvic Packing / Bladder Repair / Other (specify)<br><br>Negative laparotomy / Nontherapeutic laparotomy        |
| Estimated blood loss                                                                                        | ml                                                                                                                                                                                                                                    |
| Method of abdominal closure                                                                                 | Primary Closure / Left Open (for planned relook)                                                                                                                                                                                      |
| Concurrent operations (region involved)                                                                     | Head or Neck / Chest / Upper Limb / Lower Limb / Other (please specify)                                                                                                                                                               |
| Intra-operative death                                                                                       | Yes / No                                                                                                                                                                                                                              |
| Senior surgeon grade                                                                                        | Consultant or Attending General Surgeon / Registrar or Resident General Surgeon (in training) / Other Surgeon Speciality (in training) / Medically Qualified but not in Surgical Training / Not Medically Qualified Surgical Provider |
| Senior anaesthesia provider grade                                                                           | Consultant or Attending Anaesthetist / Registrar or Resident Anaesthetist (in training) / Not Medically Qualified Anaesthesia Provider / Anaesthetic Administered by the Surgeon                                                      |
| Outcome                                                                                                     |                                                                                                                                                                                                                                       |
| Date of discharge (or death if died on index admission)                                                     | DD/MM/YYYY                                                                                                                                                                                                                            |
| Post-operative organ support required:<br>- Circulatory support<br>- Respiratory support<br>- Renal support | Vasopressor or Inotropic Agents / Mechanical / None<br>Intubation & Ventilation / Positive Pressure Support / None<br>Renal replacement therapy / None                                                                                |
| In-hospital mortality                                                                                       | Yes / No                                                                                                                                                                                                                              |
| If Yes, was this attributable to a reversible cause? (optional)                                             | Yes / No                                                                                                                                                                                                                              |

|                                                                                                          |                                                                                                                                                                                                                                                                                                                                                                      |
|----------------------------------------------------------------------------------------------------------|----------------------------------------------------------------------------------------------------------------------------------------------------------------------------------------------------------------------------------------------------------------------------------------------------------------------------------------------------------------------|
| Modified Clavin-Dindo Classification Morbidity                                                           |                                                                                                                                                                                                                                                                                                                                                                      |
| Return to theatre for abdominal surgery during the same admission?<br>If Yes, on what post-operative day | Yes/No<br>If yes, planned or unplanned                                                                                                                                                                                                                                                                                                                               |
| Discharge destination                                                                                    | Transfer to Another Hospital / Transfer to Rehabilitation Unit / Usual Place of Residence / Remains in Hospital at Day 30 / Absconded / Died / Other (state)<br>If discharged to Usual Place of Residence, are there now increased care requirements than before admission?<br>If increased care requirements, has this been met by formal or informal arrangements? |
| Any comments on this patient journey                                                                     |                                                                                                                                                                                                                                                                                                                                                                      |
